1 **Culture under normoxic conditions and enhanced virulence of phase II *Coxiella***

2 ***burnetii* transformed with a RSF1010-based shuttle vector**

3

4 Shengdong Luo<sup>1,2#</sup>, Zemin He<sup>2#</sup>, Zhihui Sun<sup>2</sup>, Yonghui Yu<sup>2</sup>, Yongqiang Jiang<sup>2</sup>, Yigang

5 Tong<sup>1\*</sup>, Lihua Song<sup>1\*</sup>

6

7 <sup>1</sup>Beijing Advanced Innovation Center for Soft Matter Science and Engineering,

8 Beijing University of Chemical Technology, Beijing, 100029, China; <sup>2</sup>State Key

9 Laboratory of Pathogen and Biosecurity, Beijing Institute of Microbiology and

10 Epidemiology, Beijing 100071, China

11

12 <sup>#</sup>These authors contributed equally.

13 <sup>\*</sup>Corresponding author. Lihua Song (songlihua@gmail.com); Yigang Tong

14 (tong.yigang@gmail.com)

15

16 **Keywords:** *Coxiella burnetii*, microaerobic, normoxia, hypoxia, splenomegaly

17

18 **Running title:** Normoxic growth of *Coxiella burnetii*

19

20 **Abstract**

21 *Coxiella burnetii* is a Gram-negative, facultative intracellular microorganism that can  
22 cause acute or chronic Q fever in human. It was recognized as an obligate intracellular  
23 organism until the revolutionary design of an axenic cystine culture medium (ACCM).  
24 Present axenic culture of *C. burnetii* strictly requires a hypoxic condition (<10%  
25 oxygen). Here we investigated the normoxic growth of *C. burnetii* strains in ACCM-2  
26 with or without tryptophan supplementation. Three *C. burnetii* strains - Henzerling  
27 phase I, Nine Mile phase II and a Nine Mile phase II transformant, were included. The  
28 transformant contains a pMMGK plasmid that is composed of a RSF1010 ori, a  
29 repABC operon, an eGFP gene and a kanamycin resistance cassette. We found that,  
30 under normoxia if starting from an appropriate concentration of fresh age inocula,  
31 Nine Mile phase II can grow significantly in ACCM-2 with tryptophan, while the  
32 transformant can grow robustly in ACCM-2 with or without tryptophan. In contrast,  
33 long-term frozen stocks of phase II and its transformant, and Henzerling phase I of  
34 different ages had no growth capability under normoxia under any circumstances.  
35 Furthermore, frozen stocks of the transformant consistently caused large  
36 splenomegaly in SCID mice, while wild type Nine Mile phase II induced a lesser  
37 extent of splenomegaly. Taken together, our data show that normoxic cultivation of  
38 phase II *C. burnetii* can be achieved under certain conditions. Our data suggests that  
39 tryptophan and an unknown temperature sensitive signal are involved in the  
40 expression of genes for normoxic growth regulated by quorum sensing in *C. burnetii*.

## 41 **Introduction**

42 *Coxiella burnetii* is a Gram-negative, facultative intracellular pathogen and the  
43 causative agent of human Q fever. The primary transmission route for human is  
44 through inhalation of contaminated aerosols from the secretions and excretions of  
45 domestic ruminants (1). *C. burnetii* infections in humans may manifest as an acute  
46 disease (mainly as a self-limiting febrile illness, pneumonia, or hepatitis) or as a  
47 chronic disease (mainly endocarditis in patients with previous valvulopathy) (2). The  
48 majority (~50-60%) of human infections are asymptomatic (2, 3). Chronic infections  
49 are rare but can be fatal if untreated. *C. burnetii* is a significant cause of  
50 culture-negative endocarditis in the United States (4). Treatment of chronic infections  
51 is challenging and currently requires a combined antibiotic therapy with doxycycline  
52 and hydroxychloroquine for at least 18 months (5). Worldwide only one vaccine for Q  
53 fever called Q-Vax is licensed in Australia to protect high risk populations (6).

54 *C. burnetii* has two phase variants. Virulent *C. burnetii* isolated from natural  
55 sources and infections is defined as phase I. It produces full-length LPS that may play  
56 an important role in *C. burnetii* persistent infections by masking toll-like receptor  
57 ligands from innate immune recognition by human dendritic cells (7). LPS from phase  
58 I *C. burnetii* contains two unique biomarkers of methylated sugars (virenose and  
59 dihydrohydroxystreptose) at its O-specific chain. When extensively passaged in  
60 immunoincompetent hosts, virulent phase I *C. burnetii* mutates to avirulent phase II (8,  
61 9). LPS from phase II *C. burnetii* is severely truncated and only contains lipid A and  
62 partial core oligosaccharide. Lipid A, the basal component of LPS, is essential for *C.*

63 *burnetii* growth in macrophage-like THP-1 cells but nonessential in non-phagocytic  
64 cells (10).

65 The recent description of an axenic culture medium and the subsequent modified  
66 axenic culture media provide invaluable tools for *C. burnetii* research (11-15). The  
67 first generation of axenic culture of *C. burnetii* requires a complex nutrient-rich  
68 medium (Acidified Citrate Cysteine Medium, ACCM) and microaerophilic conditions  
69 with 2.5% oxygen and 5% carbon dioxide (11). A second-generation medium  
70 (ACCM-2) was generated by replacing fetal bovine serum with  
71 methyl-beta-cyclodextrin (12), then was improved by supplementing tryptophan (14,  
72 15). A nutritionally defined medium (ACCM-D) further improved *C. burnetii* growth  
73 especially with increased bacterial viability (13). The continuous improvement of  
74 axenic culture systems significantly facilitates the development of the *C. burnetii*  
75 field.

76 Phase I *C. burnetii* is a category B select agent with potential for illegitimate use  
77 and requires a biosafety level-3 laboratory for culture (16). Phase II *C. burnetii* is  
78 approved for use at biosafety level-2 and is widely used for studying the biology and  
79 pathogenesis in tissue culture. The caveat of working with phase II *C. burnetii* is the  
80 lack of animal models for assessing *in vivo* pathogenesis. To promote the  
81 identification of virulence factors in phase II *C. burnetii*, an SCID mouse model was  
82 recently established (17). An alternative infection model using larvae of the greater  
83 wax moth *Galleria mellonella* was also used to identify virulence factors in phase II *C.*  
84 *burnetii* (18, 19).

85 In this study, we characterized the growth of various *C. burnetii* strains under  
86 different oxygen concentrations in ACCM-2 with or without tryptophan  
87 supplementation. We found that, under normoxia if starting from an appropriated  
88 concentration of freshly age inocula, *C. burnetii* Nine Mile phase II had significant  
89 propagation in ACCM-2 supplemented with tryptophan. Under same conditions, a  
90 Nine phase II transformant that contains a RSF1010-based shuttle vector can have  
91 robust growth in ACCM-2 with or without tryptophan. Phase I *C. burnetii* had no  
92 apparent growth under normoxia in ACCM-2 with or without tryptophan. Long-term  
93 frozen stocks of all tested strains unanimously failed to have normoxic growth. In the  
94 SCID mouse infection model, compared to wild type Nine Mile phase II, frozen  
95 stocks of its transformant caused larger splenomegaly. Our data suggest that *C.*  
96 *burnetii* retains functional genes for aerobic growth, and the expression of these genes  
97 might be regulated by a temperature sensitive signal of the quorum sensing system.  
98 Our data also suggest that the expression of genes relating to aerobic growth is  
99 associated with enhanced *in vivo* virulence in *C. burnetii*.

## 100 **Materials and Methods**

101 ***C. burnetii* strains.** *C. burnetii* Nine Mile phase II and Henzerling phase I are from  
102 our laboratory strain collection. *C. burnetii* transformant -NMIIpMMGK was  
103 constructed by transforming Nine Mile phase II with a shuttle vector pMMGK by  
104 electroporation (20). The pMMGK plasmid is composed of a RSF1010 ori, a repABC  
105 operon, an eGFP gene and a kanamycin resistance cassette. Construction of pMMGK  
106 was described previously (10).

107 **Cultivation of *C. burnetii*.** Seed stocks of *C. burnetii* Nine Mile phase II, Henzerling  
108 phase I and phase II transformant NMIIpMMGK were collected from ACCM-2  
109 cultures at 37°C under 2.5% oxygen, and were stored in fresh ACCM-2 at -80°C.  
110 Different ages and concentrations of inocula were used to characterize *C. burnetii*  
111 growth in two media (ACCM-2 with or without tryptophan supplementation) under  
112 hypoxia or normoxia. Inocula were added in 150 µL media per well in 96 well plates  
113 (Corning). The plates were placed in a tri-gas CO<sub>2</sub> incubator (2.5% oxygen and 5%  
114 CO<sub>2</sub>) or a CO<sub>2</sub> incubator (5% CO<sub>2</sub>) for seven days at 37°C. Each culture condition has  
115 six replicates.

116 **Quantitative PCR.** Genome equivalent (GE) of *C. burnetii* was quantified by using  
117 qPCR as previously described with minor modifications (21). Bacterial bodies of *C.*  
118 *burnetii* were collected by centrifugation at 15,000 ×g for 30 min. Total DNA was  
119 extracted with TIANamp N96 Blood DNA Kit (Tiangen). Genome copy numbers  
120 were determined by Taqman probe qPCR specific to *dotA* by using a ViiA™ 7  
121 Real-Time PCR System (Applied Biosystems). PCR conditions were as follows:  
122 initial denaturation at 94°C for 10 min, followed by 40 cycles of amplification at 94°C  
123 for 15 s, 60°C for 1 min.

124 **Mouse infection.** Female SCID (CB17/Icr-Prkdc<sup>scid</sup>/IcrIcoCrI) mice were purchased  
125 from Vital River Laboratory Animal Technology Co., Ltd (Beijing, China). Two  
126 separate mouse infection experiments were conducted. Mice were infected with mock  
127 or 1×10<sup>8</sup> GE *C. burnetii* in 200 µL PBS by intra-peritoneal injection. In the first  
128 experiment, 18 four weeks old mice were divided into three groups: control (PBS)

129 group and two infection groups. Fresh age (less than one day old) inocula of Nine  
130 Mile phase II and NMIIpMMGK were used. In the second experiment, 9 five weeks  
131 old mice were averaged into three infection groups: one month old Nine Mile phase II,  
132 one-month old NMIIpMMGK and 19 months old NMIIpMMGK. At indicated days  
133 post-infection, mice were weighted and sacrificed to harvest spleens to determine  
134 splenomegaly (spleen weight/body weight). Each spleen was homogenized in 2 mL  
135 PBS. Total DNAs from 20  $\mu$ L of each tissue homogenate were purified with DNeasy  
136 Blood & Tissue Kit (Qiagen). *C. burnetii* GEs in spleens were determined by  
137 quantitative PCR as described above. All animal procedures were carried out in strict  
138 accordance with the guidelines for the Care and Use of Laboratory Animals of the  
139 National Ministry of Health of China.

140 **Statistical Analysis.** A two-tailed Student *t* test was used for qPCR analysis of *C.*  
141 *burnetii* growth yields under various conditions and was used for comparison of  
142 splenomegaly and spleen bacterial loads of different infection groups.

## 143 **Results**

144 **Phase II *C. burnetii* transformants can grow robustly under normoxia in**  
145 **ACCM-2 with or without tryptophan supplementation.** Current axenic culture of  
146 *C. burnetii* requires a microaerophilic environment (2.5% oxygen) (14). But  
147 interestingly, *C. burnetii* encodes terminal oxidases -cytochrome *o* (encoded by  
148 *cyoABCDE*) and cytochrome *bd* (encoded by *cydAB*), which are typically associated  
149 with aerobic and microaerophilic respiration, respectively (22). The presence of  
150 cytochrome *o* suggests the possibility of *C. burnetii* replication under aerobic

151 conditions. In our attempts to culture *C. burnetii* in regular CO<sub>2</sub> incubators (~20%  
152 oxygen), we found that a *C. burnetii* Nine Mile phase II transformant -NMIIpMMGK  
153 can grow robustly (~3 logs increase) if starting from a reasonably high inoculum  
154 concentration in the regular ACCM-2 medium (without tryptophan supplementation)  
155 (Figure 1A). The pMMGK plasmid is composed of the pMMB207 backbone (a  
156 RSF1010 *ori* and a repABC operon), an eGFP gene and a kanamycin resistance  
157 cassette (10). This initial finding of *C. burnetii* normoxic growth was made in T-flask  
158 cultures. To thoroughly characterize the influence of multiple culture parameters on *C.*  
159 *burnetii* growth, 96 well plates were used for *C. burnetii* cultivation. Tryptophan  
160 supplementation can improve the viability of *C. burnetii* in ACCM-2 (14). When  
161 cultured in ACCM-2 with tryptophan supplementation, NMIIpMMGK displayed  
162 similar growth characteristics, though there was a trend of a bigger yield in ACCM-2  
163 with tryptophan supplementation (Figure 1B).

164 **Tryptophan improved axenic growth of phase II *C. burnetii* under normoxia.** The  
165 axenic growth of wild type phase I and phase II *C. burnetii* in early generations of  
166 ACCMs without tryptophan supplementation has been extensively investigated and  
167 was reported to be microaerophilic (2.5% oxygen) (11, 12). We repeated the  
168 cultivation of wild type phase I and phase II *C. burnetii* in ACCM-2 without  
169 tryptophan at different oxygen concentrations (Figure 2AC). In ACCM-2 without  
170 tryptophan supplementation, these two strains grew normally at 2.5% oxygen but had  
171 no significant growth at 20% oxygen, which is consistent with previous reports. In  
172 ACCM-2 with tryptophan at 2.5% oxygen, both strains had similar growth yields



173 (Figure 2BD). Interestingly, in ACCM-2 with tryptophan at 20% oxygen, wild type  
174 phase II *C. burnetii* grew significantly (~2.5 logs increase) if starting from a high  
175 concentration of fresh age inocula (~4×10<sup>6</sup> GE/mL), while phase I *C. burnetii*  
176 consistently had no obvious growth. These results show tryptophan has subtly  
177 different effects on the axenic growth of wild type phase I and phase II strains.

178 **Long-term frozen stocks of *C. burnetii* strains failed to have apparent**  
179 **propagation under normoxia.** The cultivation of NMIIpMMGK at 20% oxygen was  
180 constantly repeated. Its viability at 2.5% oxygen in ACCM-2 with or without  
181 tryptophan had no obvious variation after long-term frozen (>three months) in -80°C  
182 (Figure 3AB). Interestingly, its growth ability at 20% oxygen in either medium was  
183 completely abolished after long-term frozen. Similar with NMIIpMMGK, wild type  
184 Nine Mile phase II also failed to replicate at 20% oxygen in ACCM-2 with tryptophan  
185 (Figure 3CD). The growth deficiency of wild type Henzerling phase I at 20% oxygen  
186 in either medium was consistent (Figure 3EF). Compared to growth of freshly  
187 cultivated inocula (Figure 2), lower fold change of growth yield of long-term frozen  
188 inocula was observed in either medium (Figure 3C-F), suggesting low viability of  
189 both wild type frozen stocks. Taken together, our results suggest that a temperature  
190 sensitive factor is associated with the expression of genes involved in *C. burnetii*  
191 aerobic growth and viability.

192 **Phase II *C. burnetii* transformants show enhanced virulence in the SCID mouse**  
193 **infection model.** The SCID mouse model allows for assessing *in vivo* pathogenesis of  
194 phase II *C. burnetii* (17). Our *C. burnetii* phase II strains with or without the pMMGK

195 plasmid showed variable growth capability under normoxia. We next intended to  
196 investigate whether pMMGK affects the virulence of phase II *C. burnetii* in the SCID  
197 mouse model. Firstly, fresh (one day old) inocula of  $1 \times 10^8$  genome equivalents (GE)  
198 of NMII or NMIIpMMGK were used to infect four weeks old female SCID mice by  
199 peritoneal (IP) injections. 16 days post infection similar magnitude of splenomegaly  
200 was detected in both infected groups ( $p=0.10$ ) (Figure 4A, C). Notably, two cases of  
201 exceptional splenomegaly were observed in the NMIIpMMGK group. To examine the  
202 potential influences of inoculum age on *in vivo* virulence, another infection  
203 experiment using frozen bacterial stocks and five weeks old female SCID mice were  
204 conducted. Compared to the results of using one day old inocula, 18 days post  
205 infection one-month-old frozen stock of NMII caused similar size of splenomegaly  
206 (Figure 4B, C). Unexpectedly, however, frozen stocks of both one month old and 19  
207 months old of NMIIpMMGK induced similar large splenomegaly in all infected mice  
208 (Figure 4B, C). The sizes of splenomegaly are in accordance with genome equivalents  
209 in all infected mice (Figure 4D). Taken together, frozen stocks of phase II *C. burnetii*  
210 transformants showed enhanced virulence in the SCID mouse model.

## 211 **Discussion**

212 The development of the axenic culture medium significantly advanced *C. burnetii*  
213 research (11). The axenic culture medium for *C. burnetii* was continuously improved  
214 (11-14). These medium studies found that hypoxic conditions are strictly required for  
215 *C. burnetii* axenic replication. In this study, we characterized the axenic growth of  
216 different *C. burnetii* strains in ACCM-2 with or without tryptophan supplementation,

217 especially their growth under normoxic conditions. Our goal was to further improve  
218 the axenic culture of *C. burnetii* under normoxia.

219 We found that, under normoxic conditions if starting from appropriate  
220 concentrations of fresh inoculum, *C. burnetii* transformants of pMMGK can have  
221 robust growth in ACCM-2, regardless of tryptophan supplementation. Similarly, wild  
222 type *C. burnetii* phase II can grow significantly in ACCM-2 with tryptophan  
223 supplementation. Clearly, the *C. burnetii* transformants have a greater capability of  
224 growing under normoxia. The mechanism of *C. burnetii* normoxic growth is unknown,  
225 but likely its expression of *cyoABCDE* and *cydAB* is coordinately regulated in a  
226 reciprocal fashion in response to oxygen concentration as in *E. coli* (23).

227 *C. burnetii* has been recognized as an intracellular parasite in nature. Inside the  
228 infected cells, *C. burnetii* replicates in a hypoxic, phagolysosome-like vacuole (24).  
229 The cytochrome *bd* oxidase, with its increased affinity for oxygen, is likely used by *C.*  
230 *burnetii* under hypoxic conditions. The alternative terminal ubiquinol oxidase in *C.*  
231 *burnetii* -cytochrome *o* (typically used for aerobic respiration), correlates with our  
232 finding of normoxic growth. Intriguingly, the normoxic growth is affected by multiple  
233 factors including the shuttle vector pMMGK, the age and concentration of inoculum,  
234 and the phase of *C. burnetii*. The differential normoxic growth of different strains  
235 suggests that, in *C. burnetii* phase II, a temperature-sensitive quorum sensing signal  
236 molecule like RNA might be involved in the regulated expression of genes for aerobic  
237 respiration, especially cytochrome *o*.

238 The capability of normoxic growth in ACCM-2 without tryptophan

239 supplementation is restricted to *C. burnetii* transformants. Their enhanced virulence is  
240 likely associated with normoxic growth. How might the shuttle vector pMMGK  
241 confers these “gain-of-function” phenotype to *C. burnetii*? The shuttle vector  
242 pMMGK brings new proteins (RepA, RepB, RepC, eGFP and Kan<sup>R</sup>) and new RNAs  
243 to *C. burnetii*. The potential effects of these proteins and RNAs on bacterial  
244 physiology are impossible to predict (25, 26). The RSF1010 *ori*-based shuttle vectors  
245 are commonly used for *C. burnetii* transformation (27, 28). Whether pMMGK or  
246 other similar vectors can restore normoxic growth of other *C. burnetii* phase I and  
247 phase II strains will be worthy of further investigation.

248 The normoxic cultures in this study were performed under static conditions. Given  
249 that oxygen supply in static cultures is much less than in shaken cultures, it is  
250 necessary to test *C. burnetii* propagation in normoxic shaken cultures. This will help  
251 determine the influence of inoculum concentration on *C. burnetii* growth under  
252 normoxia, as one may argue that high concentrations of inoculum might reduce the  
253 physical concentration of oxygen in media. Despite this possibility, static cultures of  
254 *C. burnetii* under normoxic and hypoxic conditions have distinct outcomes in infected  
255 macrophages (29). *C. burnetii* replication in macrophages is prevented in static  
256 hypoxic cultures, but not in static normoxic cultures (29).

257 In conclusion, we characterized the growth of various *C. burnetii* strains in  
258 ACCM-2 with or without tryptophan under normoxic and hypoxic conditions.  
259 Consistent with previous reports, *C. burnetii* had robust growth under hypoxia. What  
260 is surprising is that we found a *C. burnetii* phase II transformant and the wild type *C.*

261 *burnetii* phase II can have significant to robust growth under certain normoxic  
262 circumstances. Compared to the wild type strain, the transformant displayed enhanced  
263 virulence in the SCID mouse model. Normoxic growth of *C. burnetii* is affected by  
264 the shuttle vector pMMGK, the age and concentration of inoculum, and the phase of  
265 *C. burnetii*. Our findings suggest that current axenic culture of *C. burnetii* under  
266 hypoxia might possibly be further modified to allow routine axenic culture under  
267 normoxia.

## 268 **Acknowledgements**

269 This work was supported by National Natural Science Foundation of China (No.  
270 31570177), Fundamental Research Funds for Central Universities (No.  
271 BUCTRC201917), Key Project of Beijing University of Chemical Technology (No.  
272 XK1803-06) and Foundation of State Key Laboratory of Pathogen and Biosecurity  
273 (No. SKLPBS1409).

## 274 **References**

- 275 1. Raoult D, Marrie T, Mege J. 2005. Natural history and pathophysiology of Q  
276 fever. *Lancet Infect Dis* 5:219-26.
- 277 2. Maurin M, Raoult D. 1999. Q fever. *Clin Microbiol Rev* 12:518-53.
- 278 3. Hechemy KE. 2012. History and prospects of *Coxiella burnetii* research. *Adv*  
279 *Exp Med Biol* 984:1-11.
- 280 4. Mulye M, Samanta D, Winfree S, Heinzen RA, Gilk SD. 2017. Elevated  
281 Cholesterol in the *Coxiella burnetii* Intracellular Niche Is Bacteriolytic. *MBio*  
282 8.

- 283 5. Angelakis E, Raoult D. 2010. Q Fever. *Vet Microbiol* 140:297-309.
- 284 6. Chiu CK, Durrheim DN. 2007. A review of the efficacy of human Q fever  
285 vaccine registered in Australia. *N S W Public Health Bull* 18:133-6.
- 286 7. Shannon JG, Howe D, Heinzen RA. 2005. Virulent *Coxiella burnetii* does not  
287 activate human dendritic cells: role of lipopolysaccharide as a shielding  
288 molecule. *Proc Natl Acad Sci U S A* 102:8722-7.
- 289 8. Hackstadt T. 1988. Steric hindrance of antibody binding to surface proteins of  
290 *Coxiella burnetii* by phase I lipopolysaccharide. *Infect Immun* 56:802-7.
- 291 9. Beare PA, Jeffrey BM, Long CM, Martens CM, Heinzen RA. 2018. Genetic  
292 mechanisms of *Coxiella burnetii* lipopolysaccharide phase variation. *PLoS*  
293 *Pathog* 14:e1006922.
- 294 10. Wang T, Yu Y, Liang X, Luo S, He Z, Sun Z, Jiang Y, Omsland A, Zhou P,  
295 Song L. 2018. Lipid A Has Significance for Optimal Growth of *Coxiella*  
296 *burnetii* in Macrophage-Like THP-1 Cells and to a Lesser Extent in Axenic  
297 Media and Non-phagocytic Cells. *Front Cell Infect Microbiol* 8:192.
- 298 11. Omsland A, Cockrell DC, Howe D, Fischer ER, Virtaneva K, Sturdevant DE,  
299 Porcella SF, Heinzen RA. 2009. Host cell-free growth of the Q fever  
300 bacterium *Coxiella burnetii*. *Proc Natl Acad Sci U S A* 106:4430-4.
- 301 12. Omsland A, Beare PA, Hill J, Cockrell DC, Howe D, Hansen B, Samuel JE,  
302 Heinzen RA. 2011. Isolation from animal tissue and genetic transformation of  
303 *Coxiella burnetii* are facilitated by an improved axenic growth medium. *Appl*  
304 *Environ Microbiol* 77:3720-5.

- 305 13. Sandoz KM, Beare PA, Cockrell DC, Heinzen RA. 2016. Complementation of  
306 Arginine Auxotrophy for Genetic Transformation of *Coxiella burnetii* by Use  
307 of a Defined Axenic Medium. *Appl Environ Microbiol* 82:3042-51.
- 308 14. Vallejo Esquerra E, Yang H, Sanchez SE, Omsland A. 2017. Physicochemical  
309 and Nutritional Requirements for Axenic Replication Suggest Physiological  
310 Basis for *Coxiella burnetii* Niche Restriction. *Front Cell Infect Microbiol*  
311 7:190.
- 312 15. Sanchez SE, Vallejo-Esquerra E, Omsland A. 2018. Use of Axenic Culture  
313 Tools to Study *Coxiella burnetii*. *Curr Protoc Microbiol*  
314 doi:10.1002/cpmc.52:e52.
- 315 16. Atlas RM. 2003. Bioterrorism and biodefence research: changing the focus of  
316 microbiology. *Nat Rev Microbiol* 1:70-4.
- 317 17. van Schaik EJ, Case ED, Martinez E, Bonazzi M, Samuel JE. 2017. The SCID  
318 Mouse Model for Identifying Virulence Determinants in *Coxiella burnetii*.  
319 *Front Cell Infect Microbiol* 7:25.
- 320 18. Norville IH, Hartley MG, Martinez E, Cantet F, Bonazzi M, Atkins TP. 2014.  
321 *Galleria mellonella* as an alternative model of *Coxiella burnetii* infection.  
322 *Microbiology* 160:1175-81.
- 323 19. Selim A, Yang E, Rousset E, Thiery R, Sidi-Boumedine K. 2018.  
324 Characterization of *Coxiella burnetii* strains from ruminants in a *Galleria*  
325 *mellonella* host-based model. *New Microbes New Infect* 24:8-13.
- 326 20. Beare PA, Heinzen RA. 2014. Gene inactivation in *Coxiella burnetii*. *Methods*

- 327 Mol Biol 1197:329-45.
- 328 21. Coleman SA, Fischer ER, Howe D, Mead DJ, Heinzen RA. 2004. Temporal  
329 analysis of *Coxiella burnetii* morphological differentiation. J Bacteriol  
330 186:7344-52.
- 331 22. Omsland A, Heinzen RA. 2011. Life on the outside: the rescue of *Coxiella*  
332 *burnetii* from its host cell. Annu Rev Microbiol 65:111-28.
- 333 23. Tseng CP, Albrecht J, Gunsalus RP. 1996. Effect of microaerophilic cell  
334 growth conditions on expression of the aerobic (*cyoABCDE* and *cydAB*) and  
335 anaerobic (*narGHJI*, *frdABCD*, and *dmsABC*) respiratory pathway genes in  
336 *Escherichia coli*. J Bacteriol 178:1094-8.
- 337 24. Minnick MF, Raghavan R. 2012. Developmental biology of *Coxiella burnetii*.  
338 Adv Exp Med Biol 984:231-48.
- 339 25. Baltrus DA. 2013. Exploring the costs of horizontal gene transfer. Trends Ecol  
340 Evol 28:489-95.
- 341 26. Yano H, Shintani M, Tomita M, Suzuki H, Oshima T. 2019. Reconsidering  
342 plasmid maintenance factors for computational plasmid design. Comput Struct  
343 Biotechnol J 17:70-81.
- 344 27. Chen C, Banga S, Mertens K, Weber MM, Gorbasljeva I, Tan Y, Luo ZQ,  
345 Samuel JE. 2010. Large-scale identification and translocation of type IV  
346 secretion substrates by *Coxiella burnetii*. Proc Natl Acad Sci U S A  
347 107:21755-60.
- 348 28. Voth DE, Beare PA, Howe D, Sharma UM, Samoilis G, Cockrell DC,



349 Omsland A, Heinzen RA. 2011. The *Coxiella burnetii* cryptic plasmid is  
350 enriched in genes encoding type IV secretion system substrates. *J Bacteriol*  
351 193:1493-503.

352 29. Hayek I, Fischer F, Schulze-Luehrmann J, Dettmer K, Sobotta K, Schatz V,  
353 Kohl L, Boden K, Lang R, Oefner PJ, Wirtz S, Jantsch J, Luhrmann A. 2019.  
354 Limitation of TCA Cycle Intermediates Represents an Oxygen-Independent  
355 Nutritional Antibacterial Effector Mechanism of Macrophages. *Cell Rep*  
356 26:3502-3510 e6.

### 357 **Figure legends**

358 **Figure 1.** Growth of *C. burnetii* NMIIpMMGK in ACCM-2 (A) and ACCM-2 with  
359 tryptophan supplementation (B) at 2.5% and 20% oxygen. At 2.5% oxygen, regardless  
360 of its inoculum concentration, the NMIIpMMGK strain consistently has robust growth  
361 in ACCM-2 and ACCM-2 plus tryptophan. At 20% oxygen, in both ACCM-2 and  
362 ACCM-2 plus tryptophan, the growth yield of NMIIpMMGK ranges from 0-3.6 logs,  
363 depending on its inoculum concentration.

364 **Figure 2.** Growth of wild type *C. burnetii* phase I and phase II strains in ACCM-2 and  
365 ACCM-2+Trp at 2.5% and 20% oxygen. In ACCM-2, at 20% oxygen, the wild type  
366 NM II and Henzerling I strains have no significant growth. In ACCM-2 plus  
367 tryptophan, at 20% oxygen, the growth of NM II ranges from 0-2.5 logs, depending  
368 on its inoculum concentration, while the Henzerling I strain consistently fails to grow.

369 **Figure 3.** Growth of frozen stocks of *C. burnetii* strains -Henzerling phase I and Nine  
370 Mile phase II and NMIIpMMGK in ACCM-2 with (A, C, E) or without tryptophan (B,

371 **D, F)** at 2.5% and 20% oxygen. In both ACCM-2 and ACCM-2 plus tryptophan,  
372 frozen stocks of three *C. burnetii* strains have significant growth at 2.5% oxygen.  
373 However, frozen stocks of all strains fail to grow at 20% oxygen, regardless of the  
374 media and their inoculum concentrations.

375 **Figure 4.** Intra-peritoneal challenge of SCID mice with different inoculum ages of *C.*  
376 *burnetii* strains -Nine Mile phase II and NMIIpMMGK. **(A, B)** Spleens were removed  
377 from challenged and control mice. **(C)** Splenomegaly calculated as spleen weight as a  
378 percentage of total body weight at the time of necropsy after infection. **(D)** Genome  
379 equivalents calculated using Taqman real-time PCR with DNA purified from infected  
380 lungs. Error bars represent standard deviation from the mean.

381

382

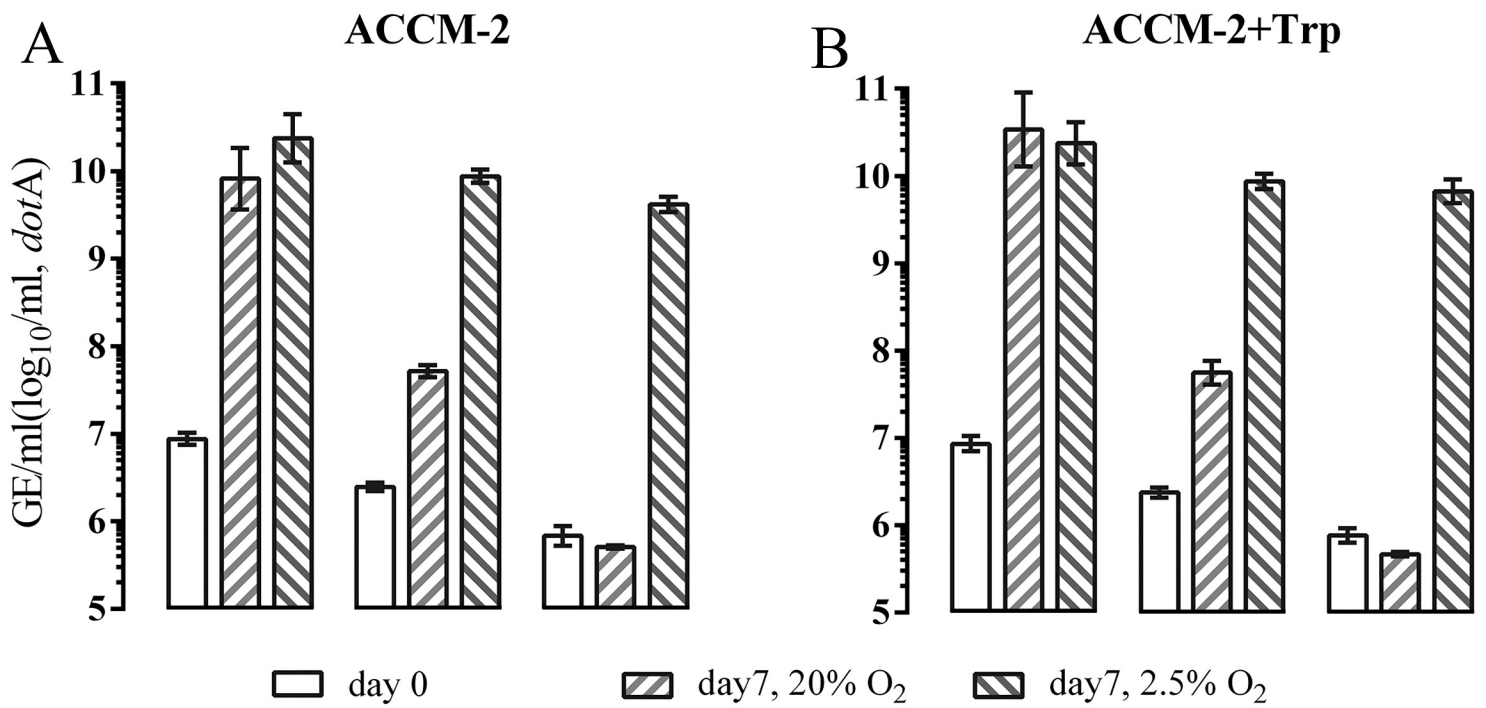

NM II

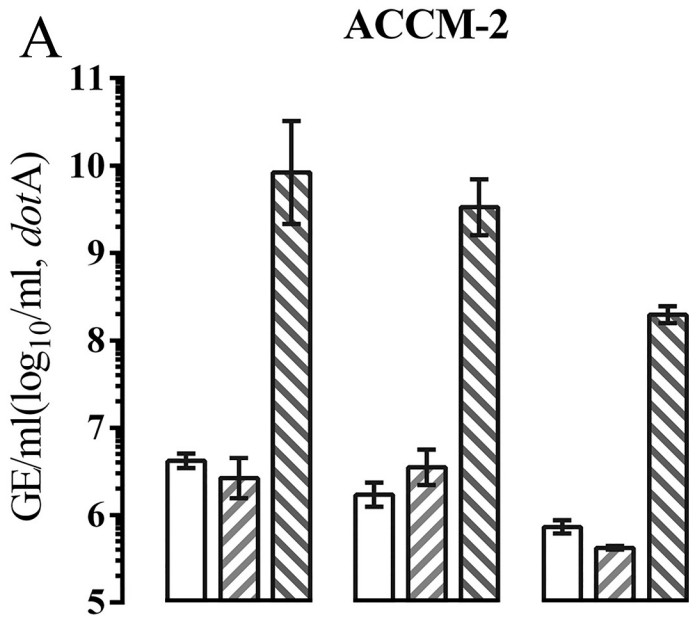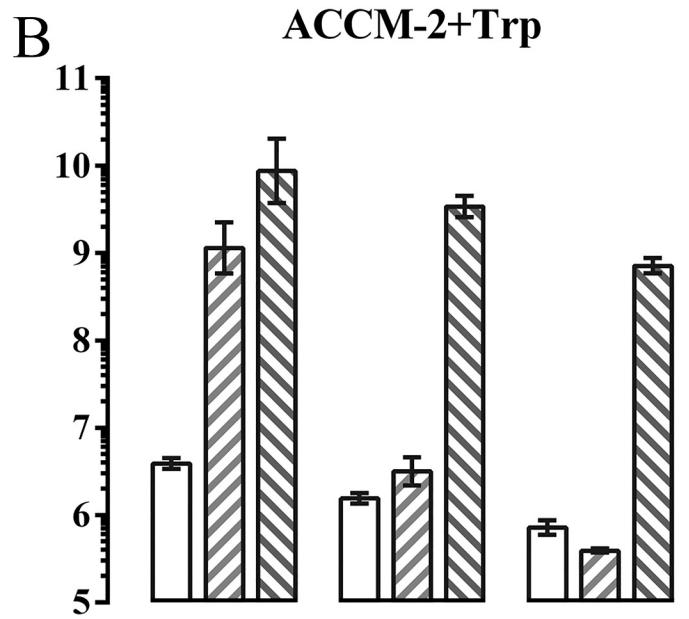

Henzerling I

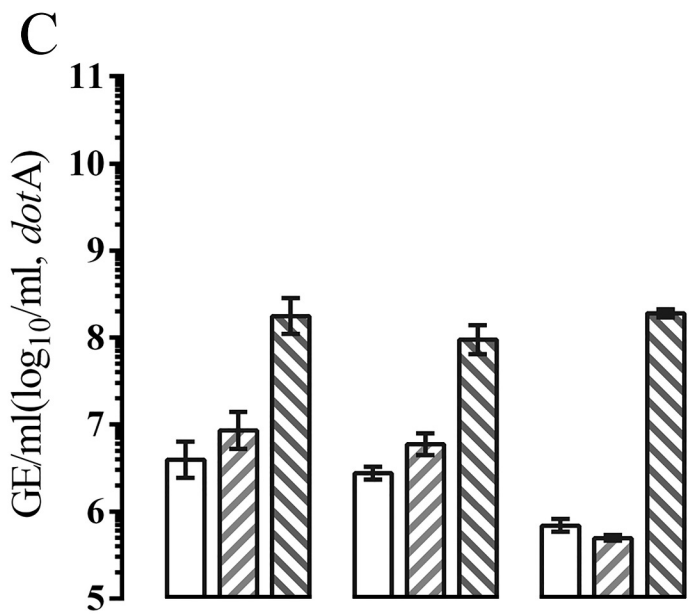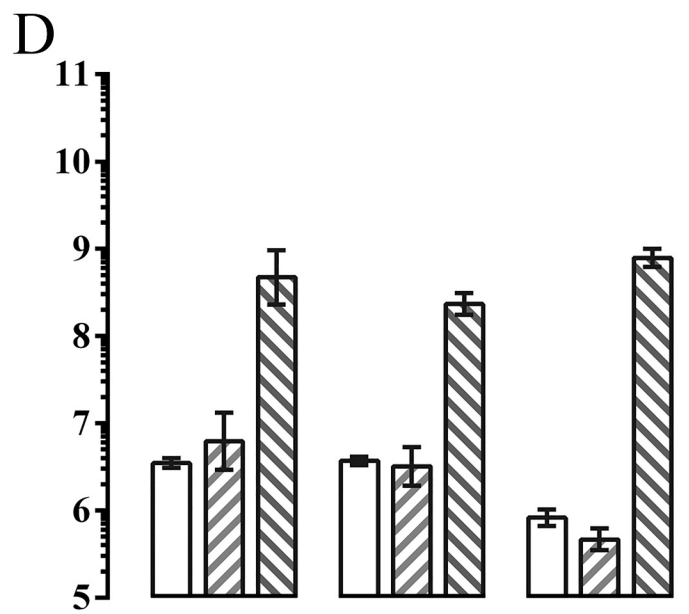

□ day 0

▨ day7, 20% O<sub>2</sub>

▩ day7, 2.5% O<sub>2</sub>

NMIIpMMGK

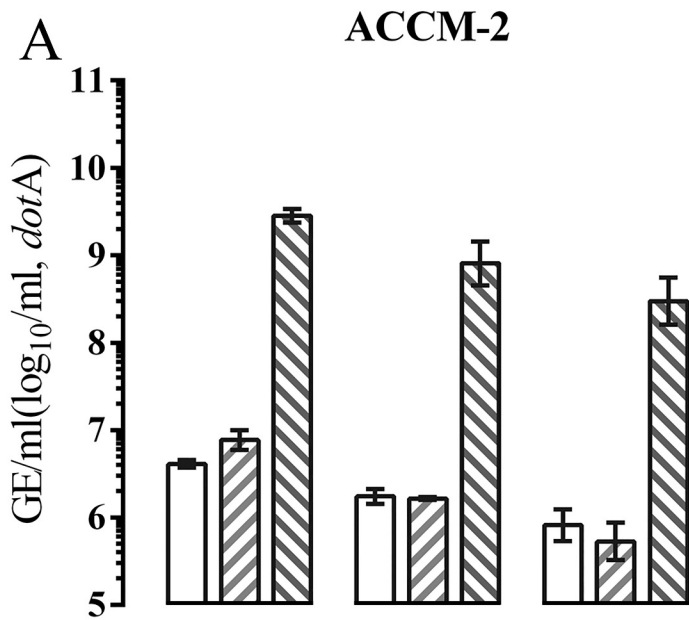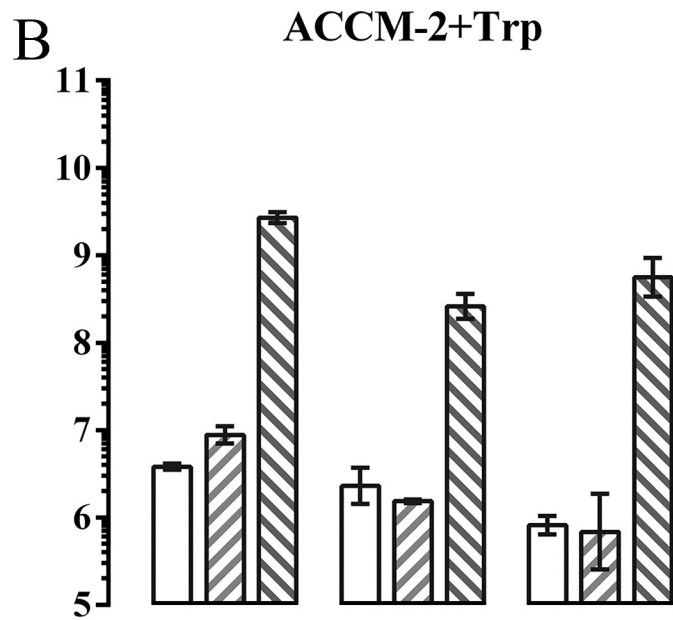

NM II

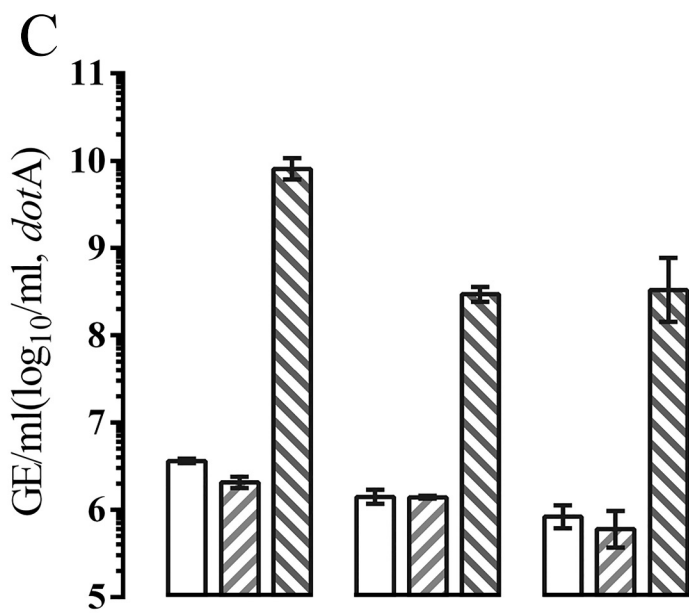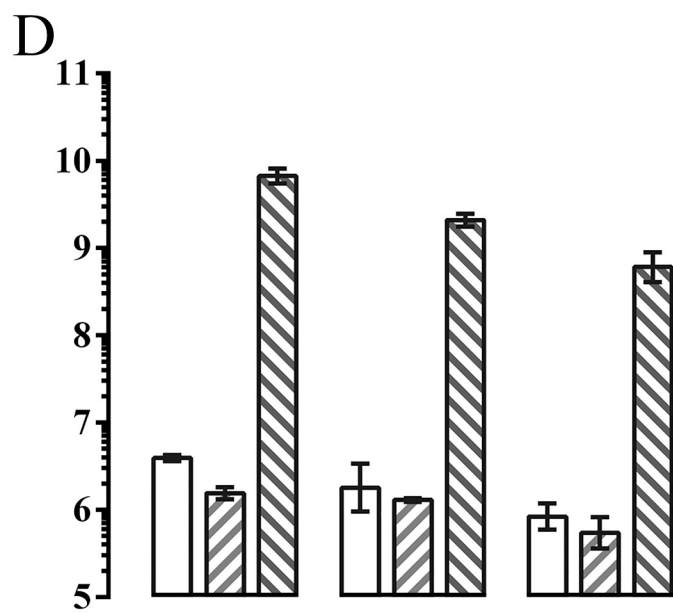

Henzerling I

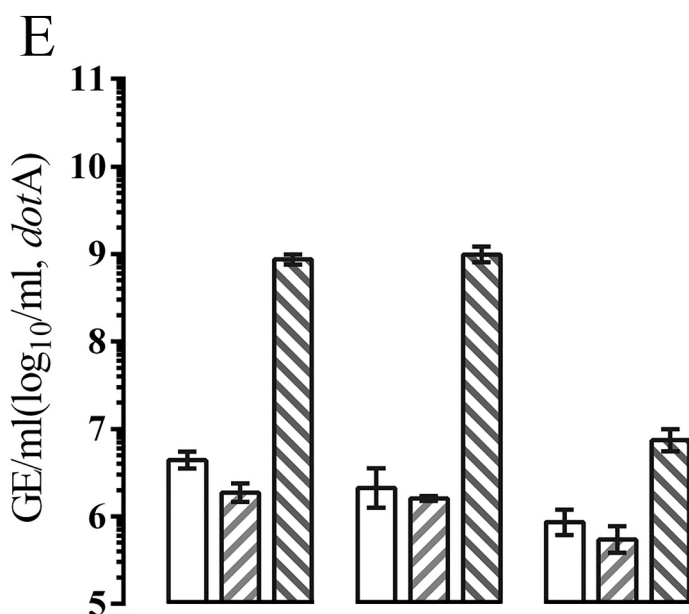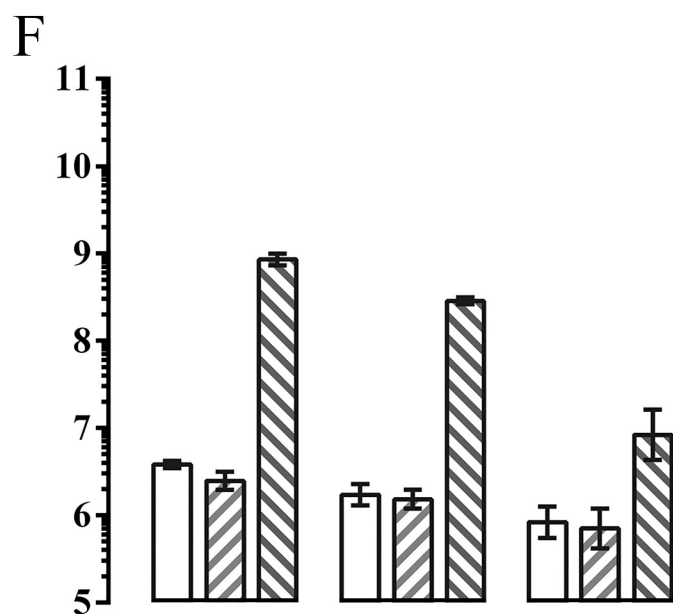

□ day 0

▨ day 7, 20% O<sub>2</sub>

▩ day 7, 2.5% O<sub>2</sub>

A

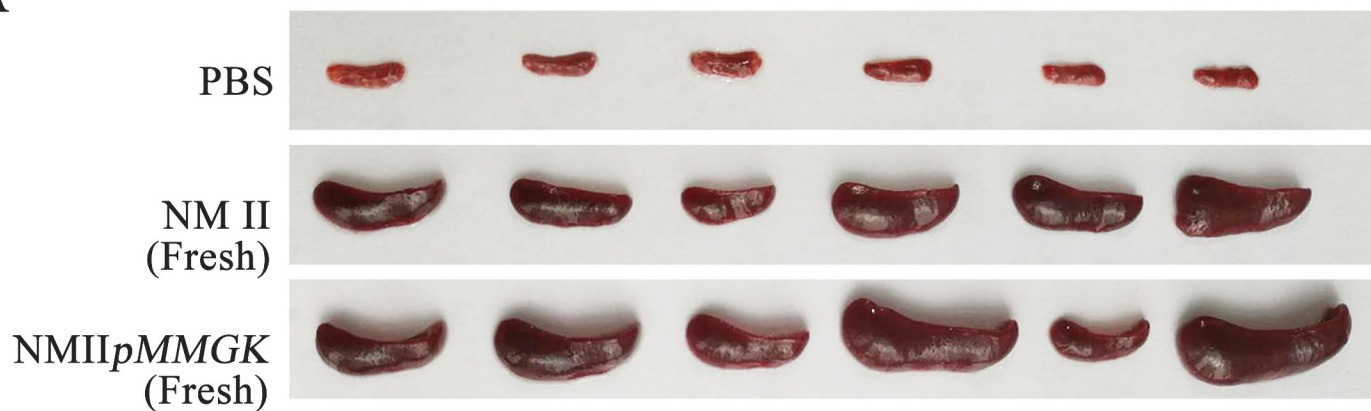

B

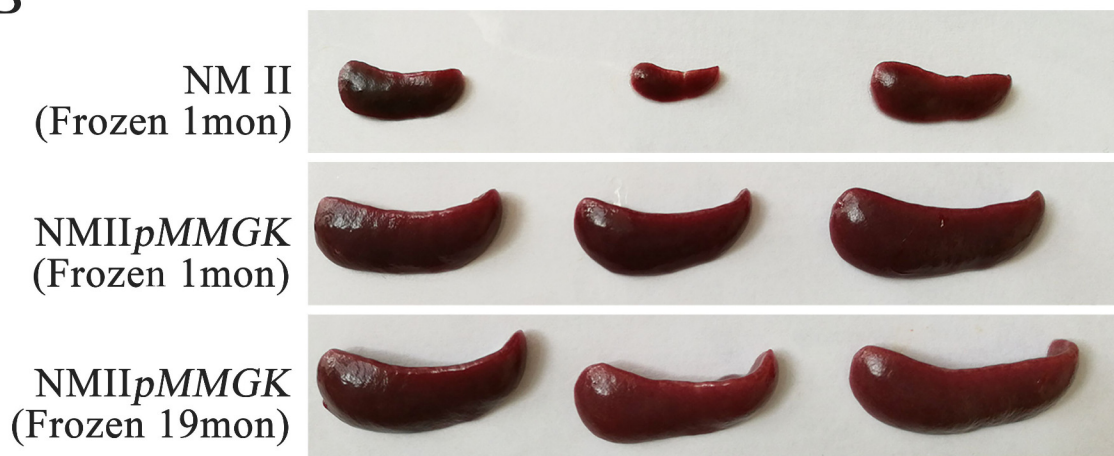

C

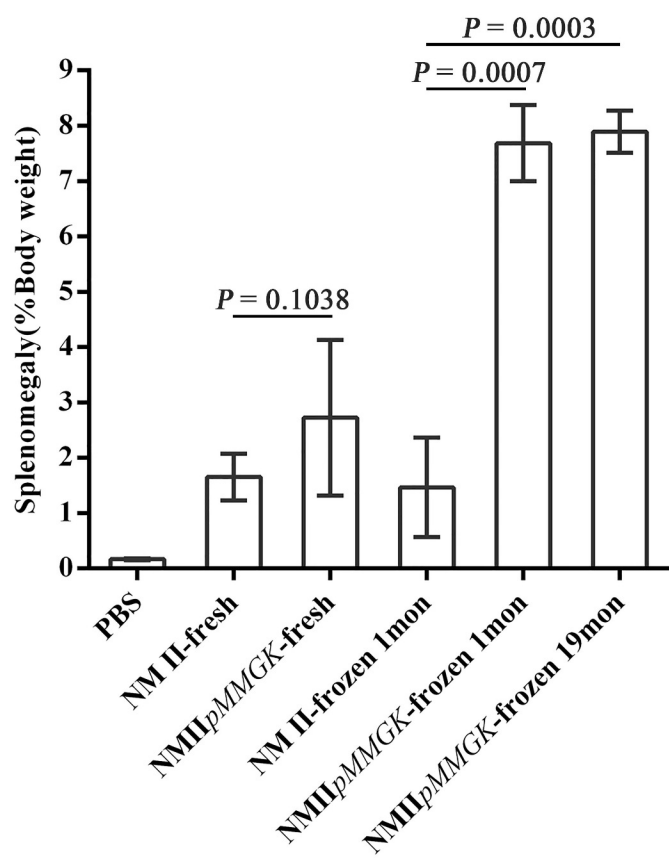

D

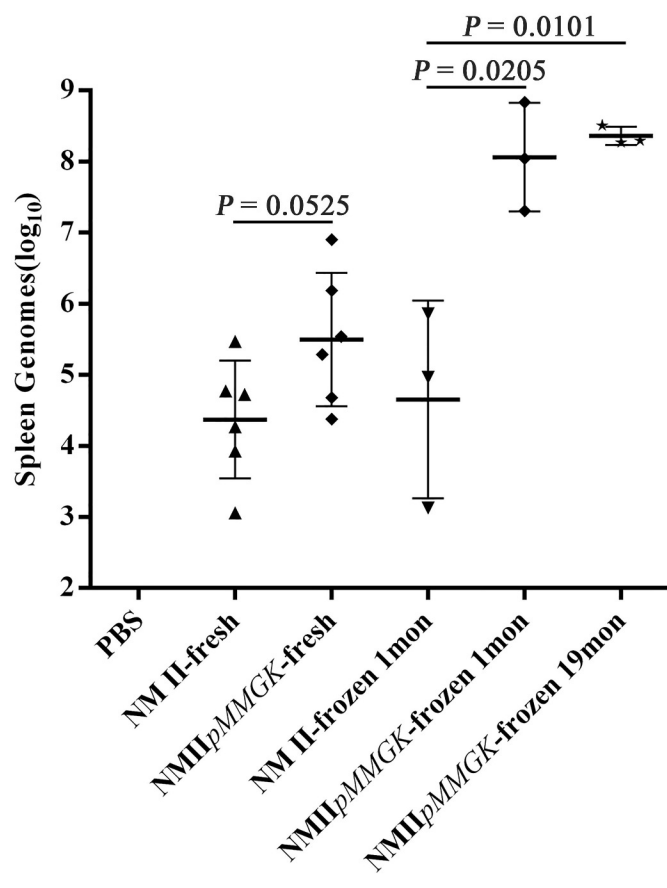

Source: https://www.biorxiv.org/content/10.1101/747220v1.full.pdf
